# Supplementary material for: 4D printed biocompatible magnetic nanocomposites toward deployable constructs
Source: Royal Society of Chemistry journal article supplement (doi:10.1039/d3ma00958k), 2024-01-01
Supplement: d3ma00958k1.pdf [file d3ma00958k1.pdf]

## **Supplementary Information**

### **4D Printed Biocompatible Magnetic Nanocomposite Toward Deployable**

#### **Constructs**

Saswat Choudhury<sup>1</sup>, Akshat Joshi<sup>1</sup>, Debayan Dasgupta<sup>2</sup>, Ambarish Ghosh<sup>2,3</sup>, Sonal

Asthana<sup>4,5</sup>, Kaushik Chatterjee<sup>1,4#</sup>

<sup>1</sup>Centre for BioSystems Science and Engineering, Indian Institute of Science, C.V. Raman Avenue, Bangalore, India 560012

<sup>2</sup>Centre for Nanoscience and Engineering, Indian Institute of Science, C.V. Raman Avenue, Bangalore, India 560012

<sup>3</sup>Department of Physics, Indian Institute of Science, C.V. Raman Avenue, Bangalore, India 560012

<sup>4</sup>Department of Materials Engineering, Indian Institute of Science, C.V. Raman Avenue, Bangalore, India 560012

<sup>5</sup>Department of Hepatobiliary and Multi-Organ Transplantation Surgery, Aster CMI Hospital, Bangalore, India 560024

#Corresponding author:

[kchatterje@iisc.ac.in](mailto:kchatterje@iisc.ac.in); +91-80-22933408

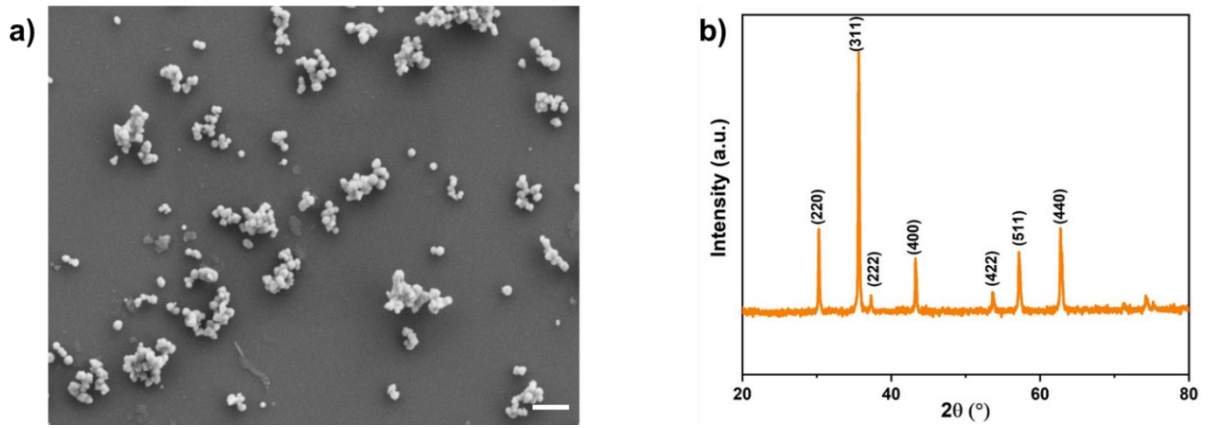

Fig S1: a) SEM and b) XRD of  $\text{Fe}_3\text{O}_4$  nanoparticles. (Scale: 1  $\mu\text{m}$ )

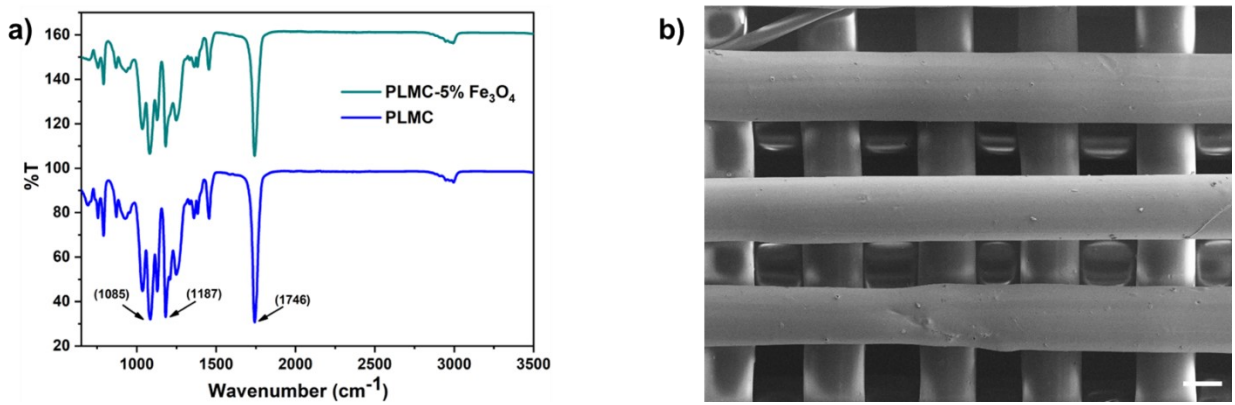

Fig S2: a) FTIR spectra of PLMC and composite, b) SEM of 3D printed PLMC-5%  $\text{Fe}_3\text{O}_4$  composite. (Scale: 100  $\mu\text{m}$ )

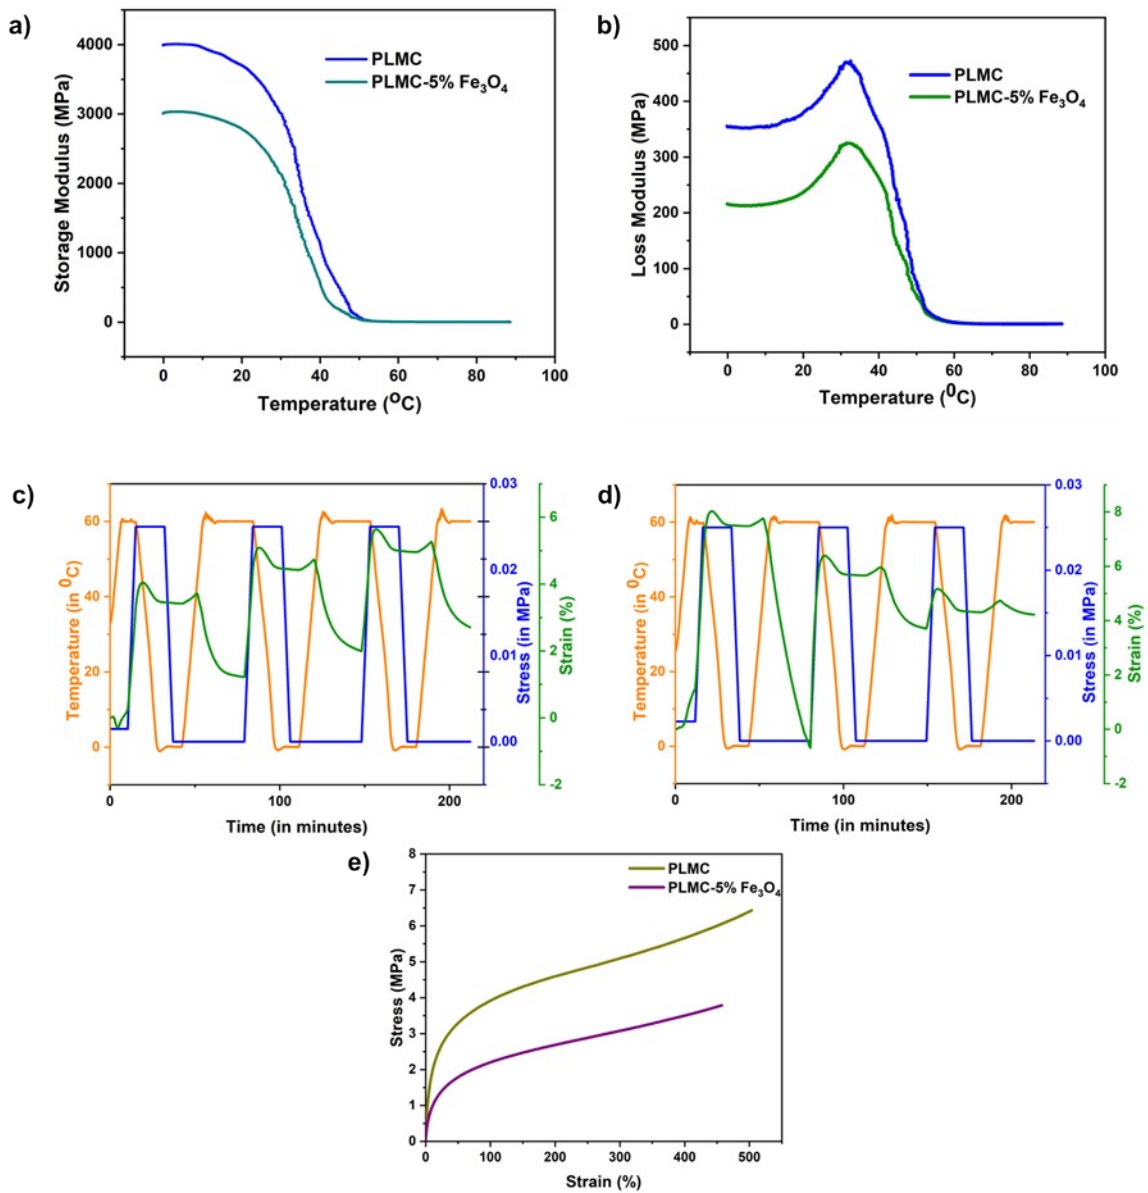

Figure S3: a) Storage modulus of PLMC and composites versus temperature, b) Loss modulus of PLMC and composites versus temperature, c) Cyclic shape memory testing of PLMC, d) Cyclic shape memory testing of PLMC composites, e) Uniaxial stress-strain profiles of PLMC and composites at 37°C.

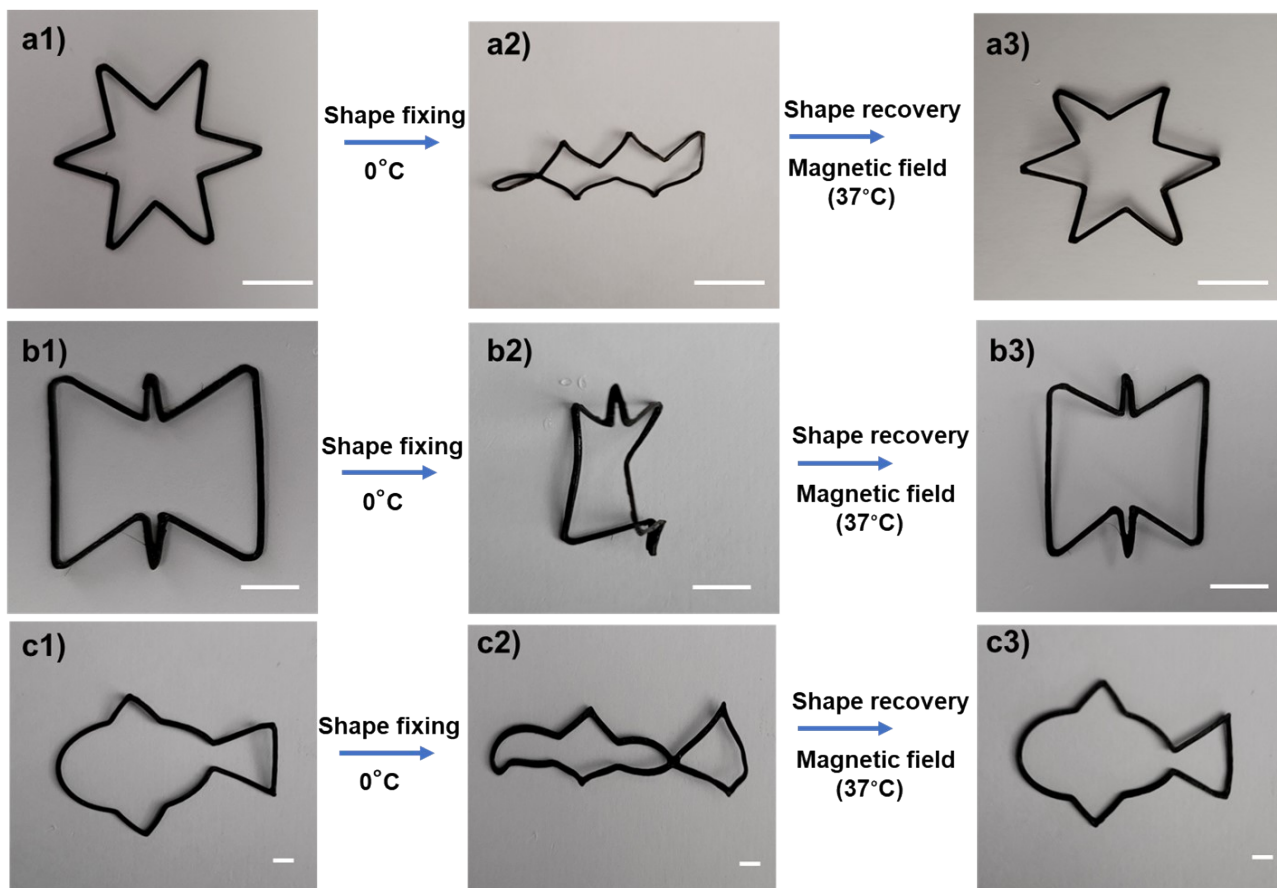

Figure S4: Shape recovery of 3D printed PLMC-5%  $\text{Fe}_3\text{O}_4$  2D shapes from pre-programmed temporary shapes to original shapes under alternating magnetic field; a1) As printed star shape, a2) Deformed and fixed ( $<T_g$ ) star, a3) Recovered ( $>T_g$ ) star, b1) As printed butterfly shape, b2) Deformed and fixed ( $<T_g$ ) butterfly, b3) Recovered ( $>T_g$ ) butterfly, c1) As-printed fish shape, c2) Deformed and fixed ( $<T_g$ ) fish, c3) Recovered ( $<T_g$ ) fish (Scale bar is 10 mm).

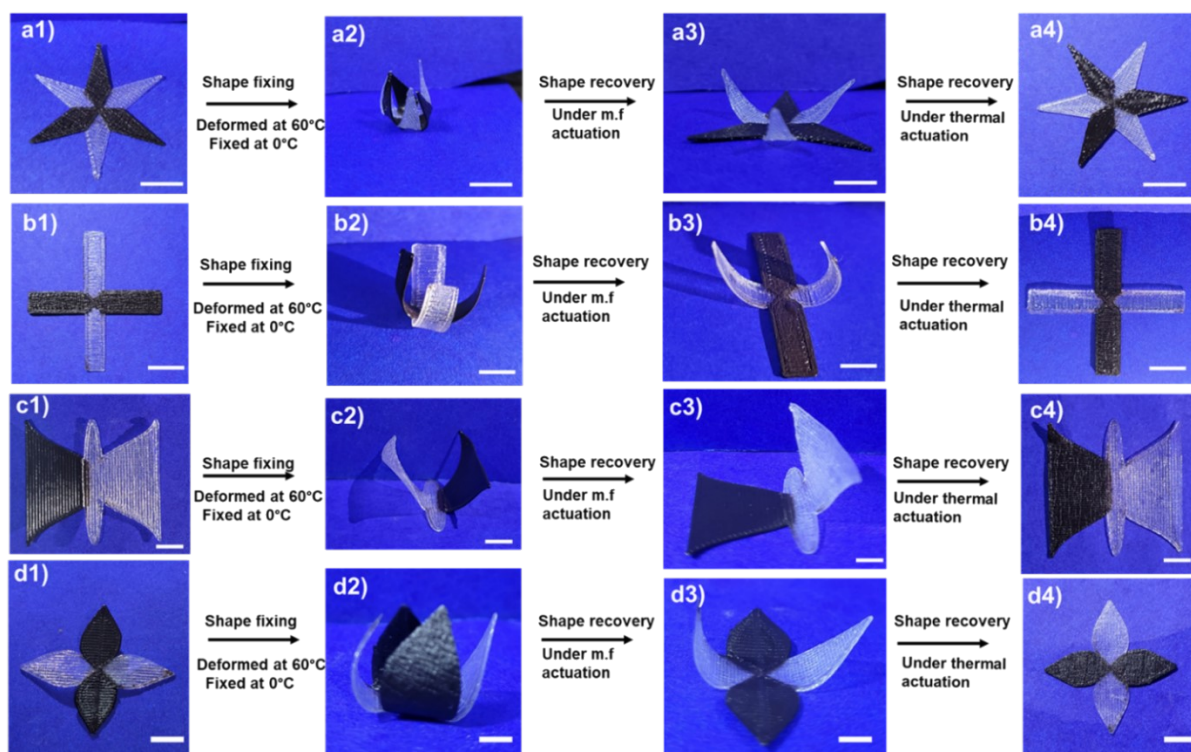

Figure S5: Shape recovery of 3D printed PLMC and PLMC-5%  $\text{Fe}_3\text{O}_4$  composite dual structures sequentially and selectively actuated under alternating magnetic field and then heat; a1) Dual-printed star, a2) Deformed star, a3) Partially recovered star by indirect heating, a4) Fully recovered star by direct heating, b1) Dual-printed cross, b2) Deformed cross, b3) Partially recovered cross by indirect heating, b4) Fully recovered cross by direct heating, c1) Dual-printed butterfly, c2) Deformed butterfly, c3) Partially recovered butterfly by indirect heating, c4) Fully recovered butterfly by direct heating, d1) Dual-printed petal, d2) Deformed petal, d3) Partially recovered petal by indirect heating, d4) Fully recovered petal by direct heating (Scale:10 mm)

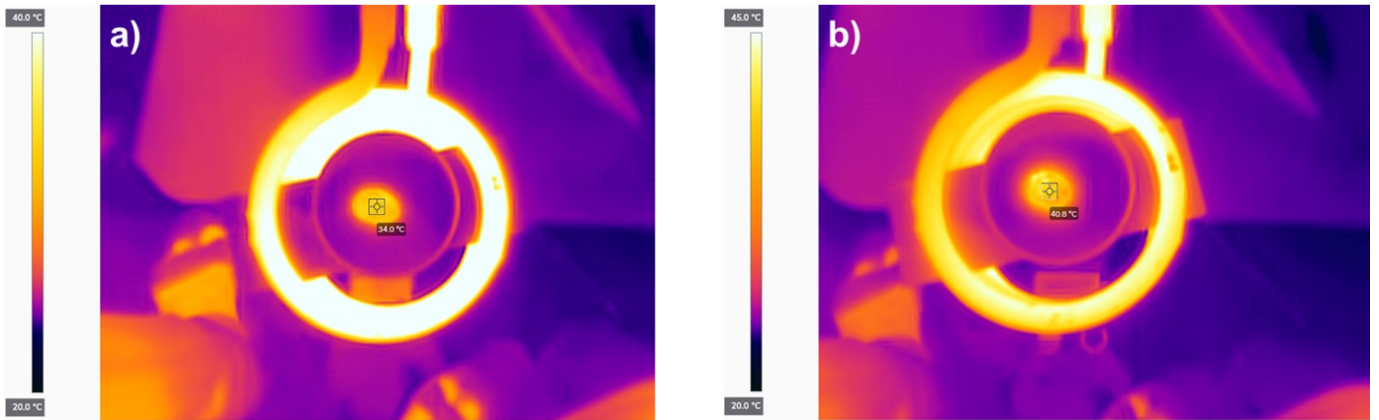

Figure S6: Thermal images captured during shape recovery of composite scaffold inside an alternating magnetic field; a) image taken at  $t=5$  s, b) image taken at  $t=13$  s after complete recovery.

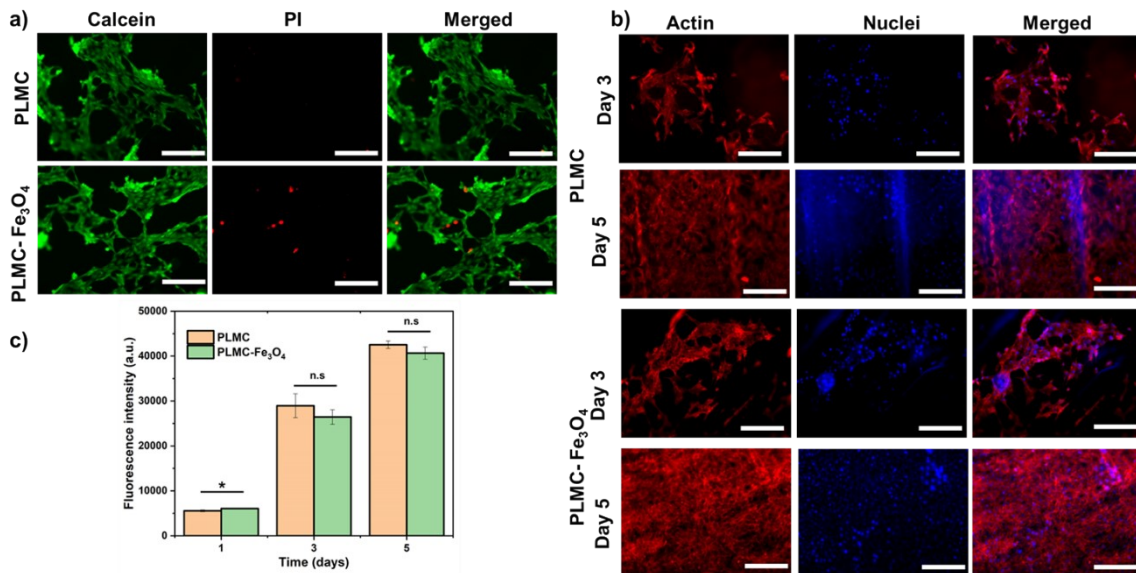

Figure S7: *In vitro* biological characterization of PLMC and its composite. a) Live-dead assay, b) Cytoskeletal staining, and c) Alamar blue assay. \* denotes  $p < 0.05$ , n.s is non-significant. (Scale bar is 100  $\mu\text{m}$ )

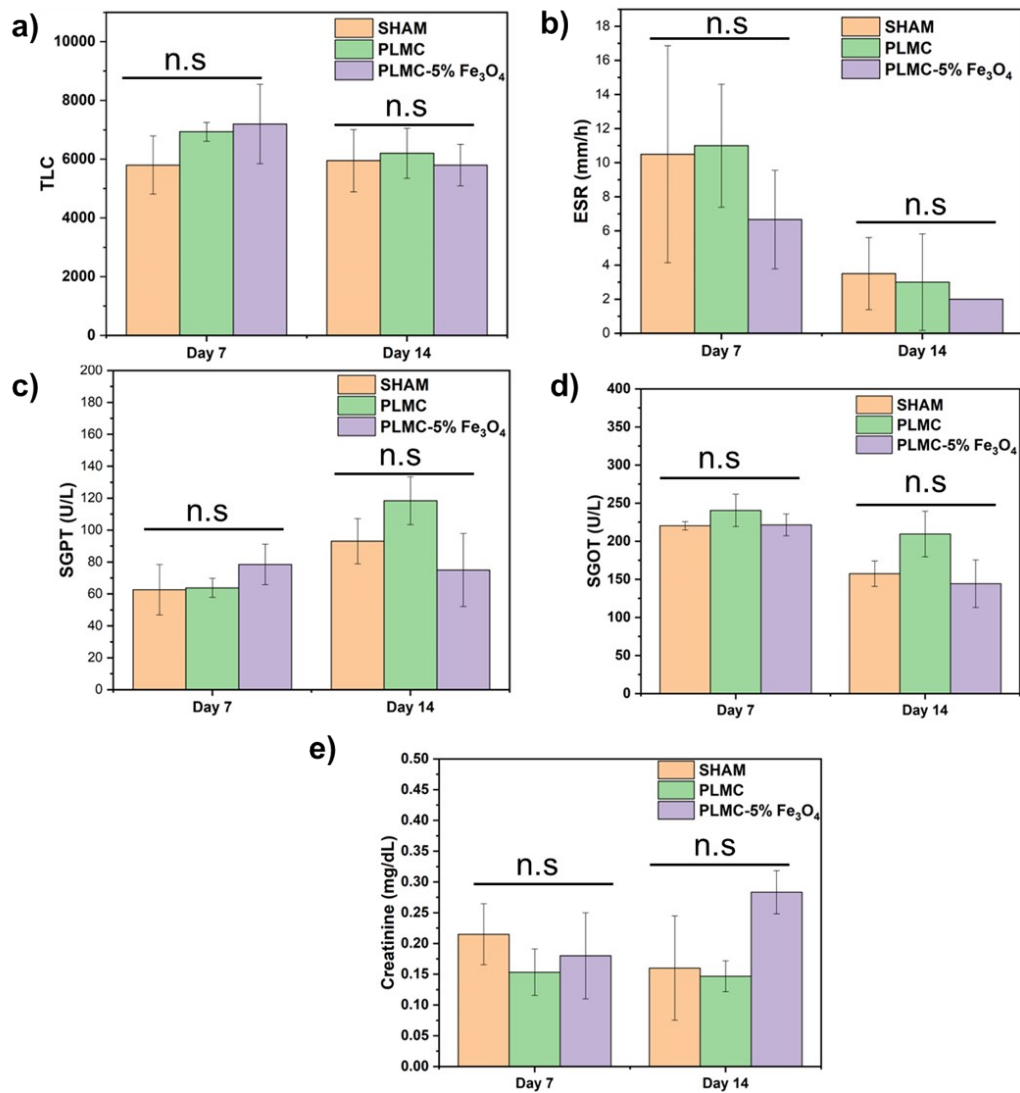

Figure S8: Plots showing data of different blood parameters a) TLC (Total leucocyte count), b) ESR (Erythrocyte sedimentation rate), c) SGPT (serum glutamic pyruvic transaminase), d) SGOT (serum glutamic-oxaloacetic transaminase), e) Serum creatinine levels assessed from SHAM, PLMC, and PLMC-Fe<sub>3</sub>O<sub>4</sub> composite groups at day 7 and day 14 confirming minimal response of the materials to elicit allergy, inflammation, hepatotoxicity, and nephrotoxicity, respectively (n.s indicates non-significance, one-way ANOVA).

Table S1: Comparison of this study with reported inductive heating SMP systems for biomedical applications:

| Material system                                                             | Filler loading (wt%) | T <sub>g</sub> (from DSC) (in °C)                    | T <sub>g</sub> (from DMA) (in °C) | Printed structures                 | Proposed application     | Comment                                                                                                                                                                     | Reference    |
|-----------------------------------------------------------------------------|----------------------|------------------------------------------------------|-----------------------------------|------------------------------------|--------------------------|-----------------------------------------------------------------------------------------------------------------------------------------------------------------------------|--------------|
| PLA/ Fe <sub>3</sub> O <sub>4</sub>                                         | 15                   | 65.35                                                | 90                                | Porous glass-sponge like scaffolds | Tracheal scaffold        | Though the composites were printed in various porous designs, high temperature of 65°C limits <i>in vivo</i> deployment.                                                    | <sup>1</sup> |
| PCL-based PUA (polyurethane acrylate)-hybrid Fe <sub>3</sub> O <sub>4</sub> | 9                    | 43.8 (transition temperature corresponds to melting) | -58.1                             | n/a                                | n/a                      | Recovery extent is slightly less (96%), no specific application proposed.                                                                                                   | <sup>2</sup> |
| PCL-dimethacrylate-Fe <sub>3</sub> O <sub>4</sub>                           | 5                    | 74 (maximum temperature attained)                    | n/a                               | Honeycomb, spider web, etc.        | Soft robotics            | High surface temperatures (74°C) limit biomedical applications.                                                                                                             | <sup>3</sup> |
| PLMC/PTMC blend (50:50)/ Fe <sub>3</sub> O <sub>4</sub>                     | 20                   | 47.22                                                | 51.86, 63.73                      | Flower, petal, etc.                | n/a                      | Both the T <sub>g</sub> s being high is a limiting factor, along with no clear justification of triple SMP in biomedicine.                                                  | <sup>4</sup> |
| PLA/ Fe <sub>3</sub> O <sub>4</sub>                                         | 15                   | 64                                                   | n/a                               | Spinal bone, flower, etc.          | n/a                      | High temperatures combined with higher filler loading restricts usage.                                                                                                      | <sup>5</sup> |
| PLMC- Fe <sub>3</sub> O <sub>4</sub>                                        | 5                    | 30                                                   | 51                                | Butterfly, fish, Bone scaffolds    | Deployable bone scaffold | Physiologically relevant temperatures, low filler loading and demonstration of scaffold deployment in free as well as restrictive conditions make for promising candidates. | This study   |



## References:

1. W. Zhao, F. Zhang, J. Leng and Y. Liu, *Composites Science and Technology*, 2019, **184**, 107866.
2. S. Salkhi Khasraghi, A. Shojaei, M. Janmaleki and U. Sundararaj, *European Polymer Journal*, 2021, **159**, 110735.
3. D. Cohn, M. Zarek, A. Elyashiv, M. A. Sbitan, V. Sharma and R. V. Ramanujan, *Smart Materials and Structures*, 2021, **30**, 045022.
4. X. Wan, Y. He, Y. Liu and J. Leng, *Additive Manufacturing*, 2022, **53**, 102689.
5. F. Zhang, L. Wang, Z. Zheng, Y. Liu and J. Leng, *Composites Part A: Applied Science and Manufacturing*, 2019, **125**, 105571.

## Video captions:

- V1: Shape recovery of a deformed 2D star under alternating magnetic field (4X)
- V2: Shape recovery of a deformed 2D butterfly under alternating magnetic field (4X)
- V3: Shape recovery of a deformed 2D fish under alternating magnetic field (4X)
- V4: Shape recovery of a deformed 3D petal under an alternating magnetic field
- V5: Shape recovery of a deformed 3D butterfly under an alternating magnetic field
- V6: Shape recovery of a deformed 3D fish under an alternating magnetic field
- V7: Shape recovery of a deformed 3D porous scaffold under an alternating magnetic field
- V8: Restrictive shape recovery of deformed shape placed inside a tube under an alternating magnetic field
- V9: Magnetic guidance of deformed shape inside a glass tube with bar magnets
- V10: Partial shape recovery of a dual-printed star under an alternating magnetic field
- V11: Partial shape recovery of a dual-printed cross under an alternating magnetic field
- V12: Partial shape recovery of a dual-printed butterfly under an alternating magnetic field
- V13: Partial shape recovery of a dual-printed petal under an alternating magnetic field
